# Supplementary material for: Promoting systems thinking and pro-environmental policy support through serious games
Source: Frontiers journal article supplement (doi:10.3389/fenvs.2022.957204), 2022-10-11
Supplement: Data_Sheet_1.docx [file Data_Sheet_1.docx]

Supplementary Material


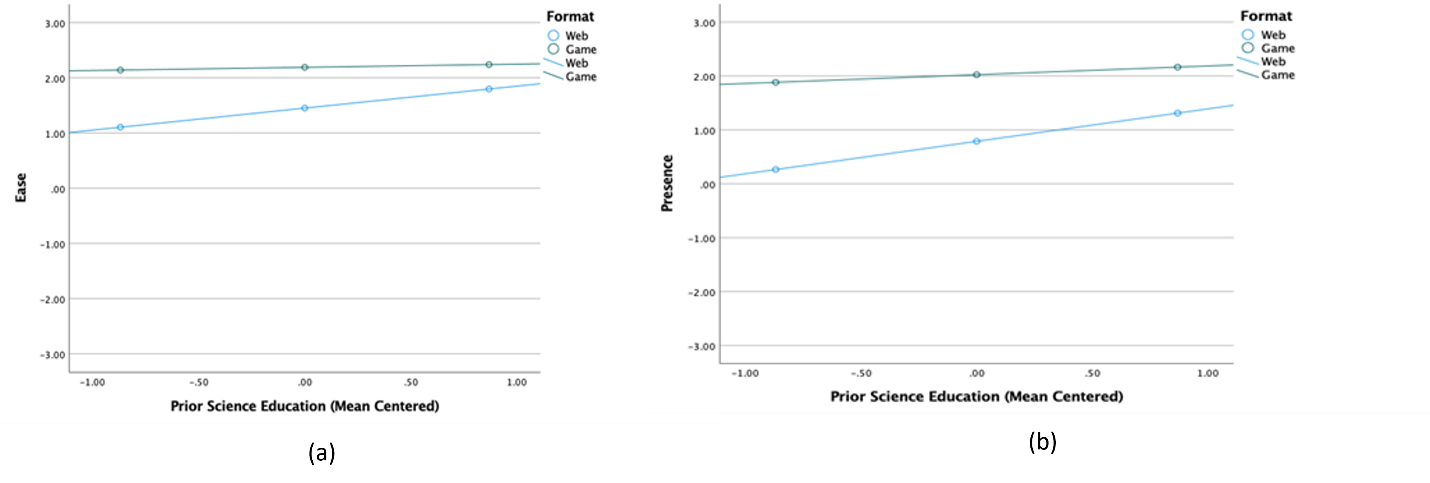


Supplementary Figure 1. Effect of format of science material and extent of past science education experiences on ease and enjoyment of the program (a), and feeling a sense of presence in the experience (b)


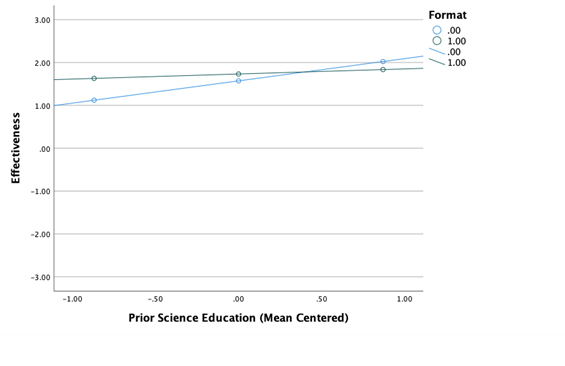


Supplementary Figure 2. Effect of format of science material and extent of past science education experiences on perceived effectiveness of the experience


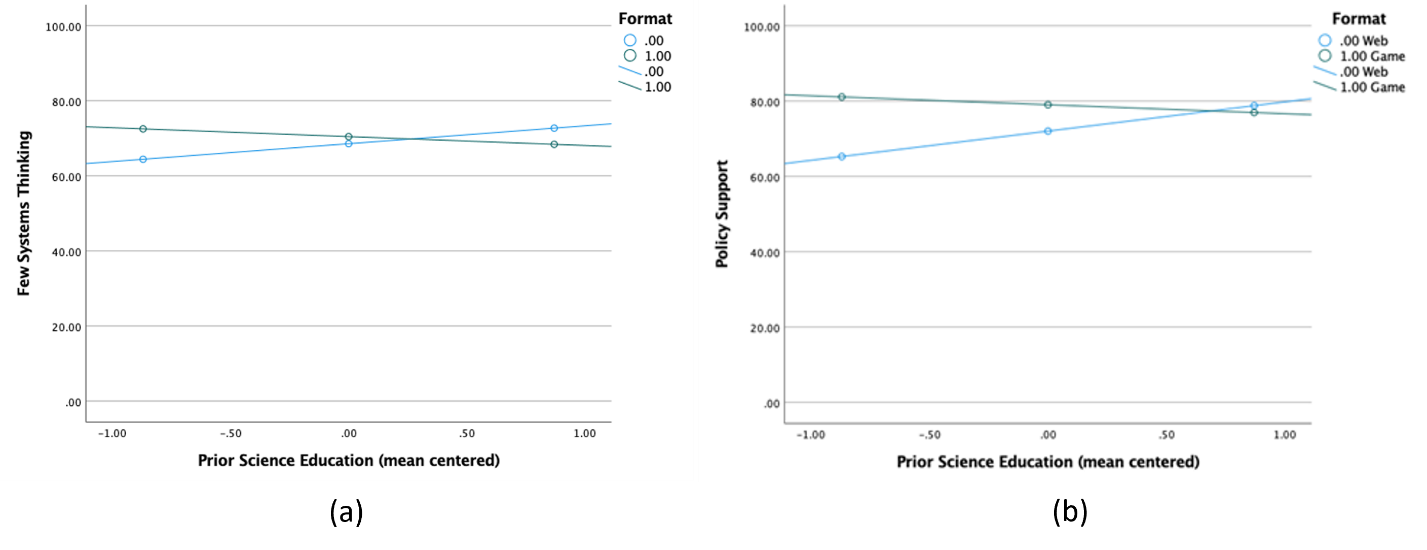


**Supplementary Figure 3**. Effect of format of science material and extent of past science educational experiences on systems thinking (a), and support for policies that influence systems thinking (b), from individual behaviors to food, energy, and water consequences
